# Supplementary material
Source: PubMed Central journal article supplement (PMC10992883)
Supplement: 262_2021_3024_MOESM1_ESM.pdf [file 262_2021_3024_MOESM1_ESM.pdf]

**Supplementary Table 1. GX301 administration regimens adopted in the study.**

| Regimens                         | Days of vaccine administration |       |       |       |        |        |        |        |
|----------------------------------|--------------------------------|-------|-------|-------|--------|--------|--------|--------|
|                                  | Day 1                          | Day 3 | Day 5 | Day 7 | Day 14 | Day 21 | Day 35 | Day 63 |
| Regimen 1<br>(8 administrations) | X                              | X     | X     | X     | X      | X      | X      | X      |
| Regimen 2<br>(4 administrations) | X                              |       |       |       | X      |        | X      | X      |
| Regimen 3<br>(2 administrations) | X                              |       |       |       |        |        |        | X      |

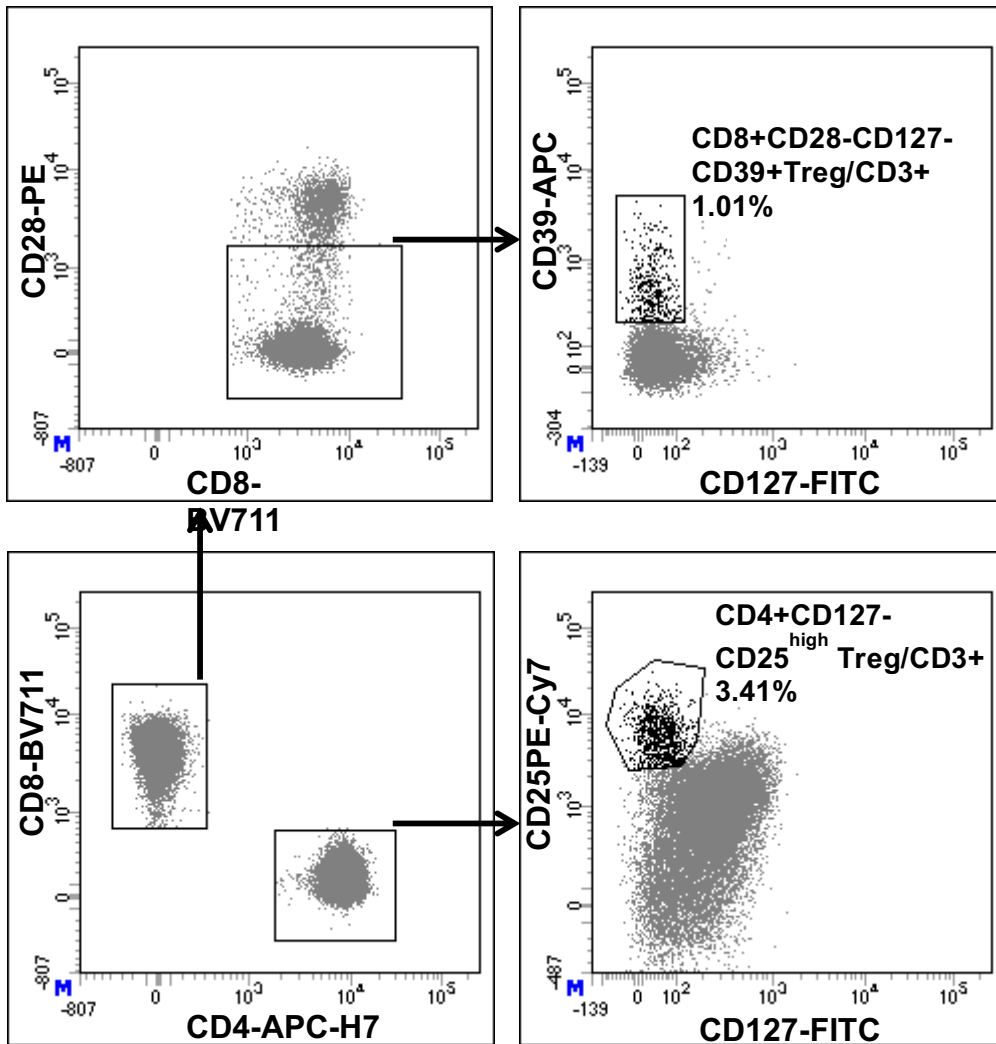

**Supplementary Fig. 1.** Representative example of gating strategy for the identification of CD4+ CD127-CD25<sup>high</sup> and CD8+CD28-CD127-CD39+ T regulatory lymphocytes from peripheral blood of patient #14 after 180 days from vaccination.
